# Supplementary material
Source: PubMed Central journal article supplement (PMC3254673)

## Supplemental Figure Legends

**Supplemental Figure 1.** Manatee graphical user interface showing (1) Main program hub, able to invoke separate instances of each analysis, or view the About/Help, (2) A preview of the raw data files (mzXML) ; includes file names, paths, and extensions, (3) the chosen targets file (with path and extension), (4) analysis parameter settings options, and (5) the command toolbar.

**Supplemental Figure 2.** List of HS compositions defining the chemical space for dp6-dp12 used for targeted analysis of LC/MS data generated on HS samples following exhaustive digestion using heparin lyase III. HS compositions are give as [ $\Delta$ HexA, HexA, acetate,  $\text{SO}_3$ ].

**Supplemental Figure 3.** Compositions of aorta HS oligosaccharides generated by Manatee, (A) saturated dp 11, (B) saturated dp12 and (C)  $\Delta$ -unsaturated dp12. HS co2mpositions are give as [ $\Delta$ HexA, HexA, acetate,  $\text{SO}_3$ ].

**Supplemental Figure 4.** Percent abundances of  $\Delta$ -unsaturated NS domains as a function of dp and organ. The data reconstructed using Manatee show the same trend as that obtained by manual interpretation [4].

## Supplemental Figures

### Supplemental Figure 1

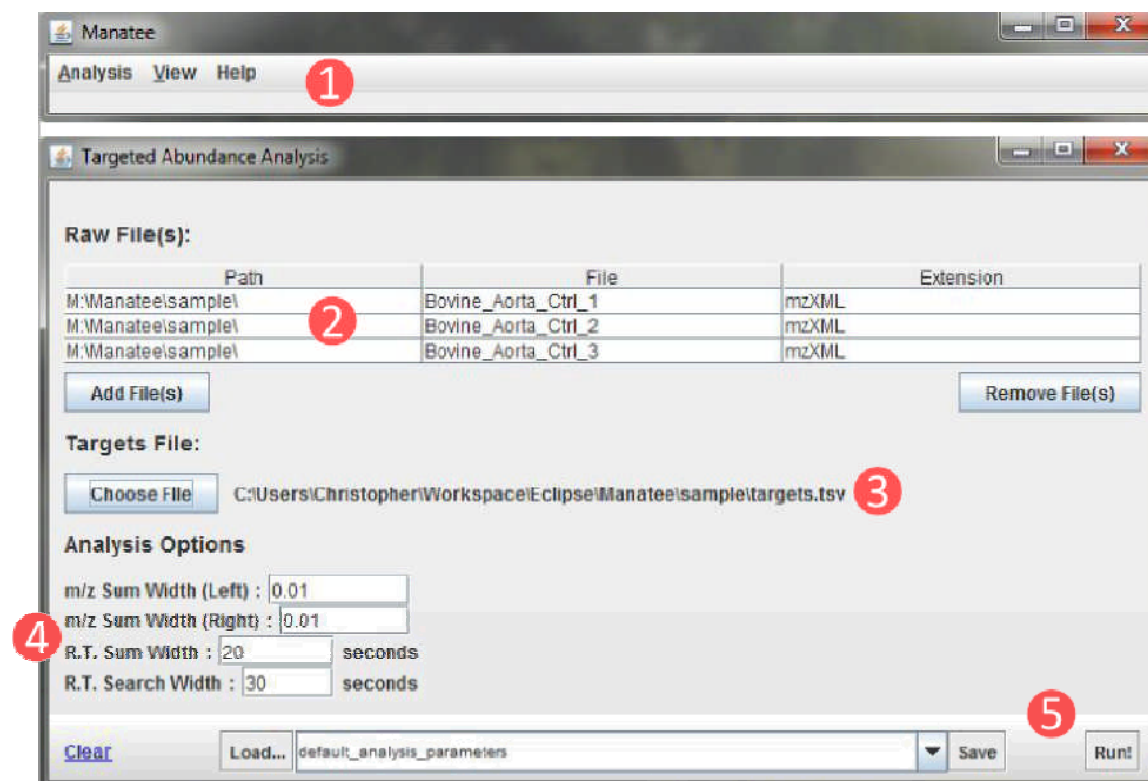

**Supplemental Figure 2.** List of targeted NS domain compositions for HS chains.

| Mass                                 | Monosaccharide Composition |      |      |                 |    | Elemental Composition |    |   |    |    |
|--------------------------------------|----------------------------|------|------|-----------------|----|-----------------------|----|---|----|----|
|                                      | $\Delta$ HexA              | HexA | HexN | SO <sub>3</sub> | Ac | C                     | H  | N | O  | S  |
| <b><math>\Delta</math>-unsat dp4</b> |                            |      |      |                 |    |                       |    |   |    |    |
| 674.2018                             | 1                          | 1    | 2    | 0               | 0  | 24                    | 38 | 2 | 20 | 0  |
| 754.1586                             | 1                          | 1    | 2    | 1               | 0  | 24                    | 38 | 2 | 23 | 1  |
| 834.1154                             | 1                          | 1    | 2    | 2               | 0  | 24                    | 38 | 2 | 26 | 2  |
| 914.0722                             | 1                          | 1    | 2    | 3               | 0  | 24                    | 38 | 2 | 29 | 3  |
| 994.0291                             | 1                          | 1    | 2    | 4               | 0  | 24                    | 38 | 2 | 32 | 4  |
| 1073.9859                            | 1                          | 1    | 2    | 5               | 0  | 24                    | 38 | 2 | 35 | 5  |
| 1153.9427                            | 1                          | 1    | 2    | 6               | 0  | 24                    | 38 | 2 | 38 | 6  |
| 1233.8995                            | 1                          | 1    | 2    | 7               | 0  | 24                    | 38 | 2 | 41 | 7  |
| 1313.8563                            | 1                          | 1    | 2    | 8               | 0  | 24                    | 38 | 2 | 44 | 8  |
| 716.2124                             | 1                          | 1    | 2    | 0               | 1  | 26                    | 40 | 2 | 21 | 0  |
| 796.1692                             | 1                          | 1    | 2    | 1               | 1  | 26                    | 40 | 2 | 24 | 1  |
| 876.1260                             | 1                          | 1    | 2    | 2               | 1  | 26                    | 40 | 2 | 27 | 2  |
| 956.0828                             | 1                          | 1    | 2    | 3               | 1  | 26                    | 40 | 2 | 30 | 3  |
| 1036.0396                            | 1                          | 1    | 2    | 4               | 1  | 26                    | 40 | 2 | 33 | 4  |
| 1115.9964                            | 1                          | 1    | 2    | 5               | 1  | 26                    | 40 | 2 | 36 | 5  |
| 1195.9532                            | 1                          | 1    | 2    | 6               | 1  | 26                    | 40 | 2 | 39 | 6  |
| 1275.9101                            | 1                          | 1    | 2    | 7               | 1  | 26                    | 40 | 2 | 42 | 7  |
| 758.2229                             | 1                          | 1    | 2    | 0               | 2  | 28                    | 42 | 2 | 22 | 0  |
| 838.1797                             | 1                          | 1    | 2    | 1               | 2  | 28                    | 42 | 2 | 25 | 1  |
| 918.1366                             | 1                          | 1    | 2    | 2               | 2  | 28                    | 42 | 2 | 28 | 2  |
| 998.0934                             | 1                          | 1    | 2    | 3               | 2  | 28                    | 42 | 2 | 31 | 3  |
| 1078.0502                            | 1                          | 1    | 2    | 4               | 2  | 28                    | 42 | 2 | 34 | 4  |
| 1158.0070                            | 1                          | 1    | 2    | 5               | 2  | 28                    | 42 | 2 | 37 | 5  |
| 1237.9638                            | 1                          | 1    | 2    | 6               | 2  | 28                    | 42 | 2 | 40 | 6  |
| <b><math>\Delta</math>-unsat dp6</b> |                            |      |      |                 |    |                       |    |   |    |    |
| 1011.3027                            | 1                          | 2    | 3    |                 |    | 36                    | 57 | 3 | 30 | 0  |
| 1091.2595                            | 1                          | 2    | 3    | 1               |    | 36                    | 57 | 3 | 33 | 1  |
| 1171.2163                            | 1                          | 2    | 3    | 2               |    | 36                    | 57 | 3 | 36 | 2  |
| 1251.1731                            | 1                          | 2    | 3    | 3               |    | 36                    | 57 | 3 | 39 | 3  |
| 1331.1299                            | 1                          | 2    | 3    | 4               |    | 36                    | 57 | 3 | 42 | 4  |
| 1411.0868                            | 1                          | 2    | 3    | 5               |    | 36                    | 57 | 3 | 45 | 5  |
| 1491.0436                            | 1                          | 2    | 3    | 6               |    | 36                    | 57 | 3 | 48 | 6  |
| 1571.0004                            | 1                          | 2    | 3    | 7               |    | 36                    | 57 | 3 | 51 | 7  |
| 1650.9572                            | 1                          | 2    | 3    | 8               |    | 36                    | 57 | 3 | 54 | 8  |
| 1730.9140                            | 1                          | 2    | 3    | 9               |    | 36                    | 57 | 3 | 57 | 9  |
| 1053.3133                            | 1                          | 2    | 3    |                 | 1  | 38                    | 59 | 3 | 31 | 0  |
| 1133.2701                            | 1                          | 2    | 3    | 1               | 1  | 38                    | 59 | 3 | 34 | 1  |
| 1213.2269                            | 1                          | 2    | 3    | 2               | 1  | 38                    | 59 | 3 | 37 | 2  |
| 1293.1837                            | 1                          | 2    | 3    | 3               | 1  | 38                    | 59 | 3 | 40 | 3  |
| 1373.1405                            | 1                          | 2    | 3    | 4               | 1  | 38                    | 59 | 3 | 43 | 4  |
| 1453.0973                            | 1                          | 2    | 3    | 5               | 1  | 38                    | 59 | 3 | 46 | 5  |
| 1533.0541                            | 1                          | 2    | 3    | 6               | 1  | 38                    | 59 | 3 | 49 | 6  |
| 1613.0110                            | 1                          | 2    | 3    | 7               | 1  | 38                    | 59 | 3 | 52 | 7  |
| 1692.9678                            | 1                          | 2    | 3    | 8               | 1  | 38                    | 59 | 3 | 55 | 8  |
| 1772.9246                            | 1                          | 2    | 3    | 9               | 1  | 38                    | 59 | 3 | 58 | 9  |
| 1095.3238                            | 1                          | 2    | 3    |                 | 2  | 40                    | 61 | 3 | 32 | 0  |
| 1175.2806                            | 1                          | 2    | 3    | 1               | 2  | 40                    | 61 | 3 | 35 | 1  |
| 1255.2374                            | 1                          | 2    | 3    | 2               | 2  | 40                    | 61 | 3 | 38 | 2  |
| 1335.1943                            | 1                          | 2    | 3    | 3               | 2  | 40                    | 61 | 3 | 41 | 3  |
| 1415.1511                            | 1                          | 2    | 3    | 4               | 2  | 40                    | 61 | 3 | 44 | 4  |
| 1495.1079                            | 1                          | 2    | 3    | 5               | 2  | 40                    | 61 | 3 | 47 | 5  |
| 1575.0647                            | 1                          | 2    | 3    | 6               | 2  | 40                    | 61 | 3 | 50 | 6  |
| 1655.0215                            | 1                          | 2    | 3    | 7               | 2  | 40                    | 61 | 3 | 53 | 7  |
| 1734.9783                            | 1                          | 2    | 3    | 8               | 2  | 40                    | 61 | 3 | 56 | 8  |
| 1814.9351                            | 1                          | 2    | 3    | 9               | 2  | 40                    | 61 | 3 | 59 | 9  |
| <b><math>\Delta</math>-unsat dp8</b> |                            |      |      |                 |    |                       |    |   |    |    |
| 1348.4036                            | 1                          | 3    | 4    |                 |    | 48                    | 76 | 4 | 40 | 0  |
| 1428.3604                            | 1                          | 3    | 4    | 1               |    | 48                    | 76 | 4 | 43 | 1  |
| 1508.3172                            | 1                          | 3    | 4    | 2               |    | 48                    | 76 | 4 | 46 | 2  |
| 1588.2740                            | 1                          | 3    | 4    | 3               |    | 48                    | 76 | 4 | 49 | 3  |
| 1668.2308                            | 1                          | 3    | 4    | 4               |    | 48                    | 76 | 4 | 52 | 4  |
| 1748.1877                            | 1                          | 3    | 4    | 5               |    | 48                    | 76 | 4 | 55 | 5  |
| 1828.1445                            | 1                          | 3    | 4    | 6               |    | 48                    | 76 | 4 | 58 | 6  |
| 1908.1013                            | 1                          | 3    | 4    | 7               |    | 48                    | 76 | 4 | 61 | 7  |
| 1988.0581                            | 1                          | 3    | 4    | 8               |    | 48                    | 76 | 4 | 64 | 8  |
| 2068.0149                            | 1                          | 3    | 4    | 9               |    | 48                    | 76 | 4 | 67 | 9  |
| 2147.9717                            | 1                          | 3    | 4    | 10              |    | 48                    | 76 | 4 | 70 | 10 |
| 2227.9285                            | 1                          | 3    | 4    | 11              |    | 48                    | 76 | 4 | 73 | 11 |
| 2307.8854                            | 1                          | 3    | 4    | 12              |    | 48                    | 76 | 4 | 76 | 12 |
| 1390.4141                            | 1                          | 3    | 4    |                 | 1  | 50                    | 78 | 4 | 41 | 0  |
| 1470.3710                            | 1                          | 3    | 4    | 1               | 1  | 50                    | 78 | 4 | 44 | 1  |
| 1550.3278                            | 1                          | 3    | 4    | 2               | 1  | 50                    | 78 | 4 | 47 | 2  |



## Supplemental Figure 2, continued

| Mass           | Monosaccharide Composition |      |      |                 |    | Elemental Composition |     |   |     |    |
|----------------|----------------------------|------|------|-----------------|----|-----------------------|-----|---|-----|----|
|                | $\Delta$ HexA              | HexA | HexN | SO <sub>3</sub> | Ac | C                     | H   | N | O   | S  |
| 2022.6054      | 1                          | 5    | 6    |                 |    | 72                    | 114 | 6 | 60  | 0  |
| 2102.5622      | 1                          | 5    | 6    | 1               |    | 72                    | 114 | 6 | 63  | 1  |
| 2182.5190      | 1                          | 5    | 6    | 2               |    | 72                    | 114 | 6 | 66  | 2  |
| 2262.4758      | 1                          | 5    | 6    | 3               |    | 72                    | 114 | 6 | 69  | 3  |
| 2342.4326      | 1                          | 5    | 6    | 4               |    | 72                    | 114 | 6 | 72  | 4  |
| 2422.3894      | 1                          | 5    | 6    | 5               |    | 72                    | 114 | 6 | 75  | 5  |
| 2502.3463      | 1                          | 5    | 6    | 6               |    | 72                    | 114 | 6 | 78  | 6  |
| 2582.3031      | 1                          | 5    | 6    | 7               |    | 72                    | 114 | 6 | 81  | 7  |
| 2662.2599      | 1                          | 5    | 6    | 8               |    | 72                    | 114 | 6 | 84  | 8  |
| 2742.2167      | 1                          | 5    | 6    | 9               |    | 72                    | 114 | 6 | 87  | 9  |
| 2822.1735      | 1                          | 5    | 6    | 10              |    | 72                    | 114 | 6 | 90  | 10 |
| 2902.1303      | 1                          | 5    | 6    | 11              |    | 72                    | 114 | 6 | 93  | 11 |
| 2982.0872      | 1                          | 5    | 6    | 12              |    | 72                    | 114 | 6 | 96  | 12 |
| 3062.0440      | 1                          | 5    | 6    | 13              |    | 72                    | 114 | 6 | 99  | 13 |
| 3142.0008      | 1                          | 5    | 6    | 14              |    | 72                    | 114 | 6 | 102 | 14 |
| 3221.9576      | 1                          | 5    | 6    | 15              |    | 72                    | 114 | 6 | 105 | 15 |
| 3301.9144      | 1                          | 5    | 6    | 16              |    | 72                    | 114 | 6 | 108 | 16 |
| 3381.8712      | 1                          | 5    | 6    | 17              |    | 72                    | 114 | 6 | 111 | 17 |
| 3461.8280      | 1                          | 5    | 6    | 18              |    | 72                    | 114 | 6 | 114 | 18 |
| 2064.6159      | 1                          | 5    | 6    |                 | 1  | 74                    | 116 | 6 | 61  | 0  |
| 2144.5728      | 1                          | 5    | 6    | 1               | 1  | 74                    | 116 | 6 | 64  | 1  |
| 2224.5296      | 1                          | 5    | 6    | 2               | 1  | 74                    | 116 | 6 | 67  | 2  |
| 2304.4864      | 1                          | 5    | 6    | 3               | 1  | 74                    | 116 | 6 | 70  | 3  |
| 2384.4432      | 1                          | 5    | 6    | 4               | 1  | 74                    | 116 | 6 | 73  | 4  |
| 2464.4000      | 1                          | 5    | 6    | 5               | 1  | 74                    | 116 | 6 | 76  | 5  |
| 2544.3568      | 1                          | 5    | 6    | 6               | 1  | 74                    | 116 | 6 | 79  | 6  |
| 2624.3136      | 1                          | 5    | 6    | 7               | 1  | 74                    | 116 | 6 | 82  | 7  |
| 2704.2705      | 1                          | 5    | 6    | 8               | 1  | 74                    | 116 | 6 | 85  | 8  |
| 2784.2273      | 1                          | 5    | 6    | 9               | 1  | 74                    | 116 | 6 | 88  | 9  |
| 2864.1841      | 1                          | 5    | 6    | 10              | 1  | 74                    | 116 | 6 | 91  | 10 |
| 2944.1409      | 1                          | 5    | 6    | 11              | 1  | 74                    | 116 | 6 | 94  | 11 |
| 3024.0977      | 1                          | 5    | 6    | 12              | 1  | 74                    | 116 | 6 | 97  | 12 |
| 3104.0545      | 1                          | 5    | 6    | 13              | 1  | 74                    | 116 | 6 | 100 | 13 |
| 3184.0113      | 1                          | 5    | 6    | 14              | 1  | 74                    | 116 | 6 | 103 | 14 |
| 3263.9682      | 1                          | 5    | 6    | 15              | 1  | 74                    | 116 | 6 | 106 | 15 |
| 3343.9250      | 1                          | 5    | 6    | 16              | 1  | 74                    | 116 | 6 | 109 | 16 |
| 3423.8818      | 1                          | 5    | 6    | 17              | 1  | 74                    | 116 | 6 | 112 | 17 |
| 2106.6265      | 1                          | 5    | 6    |                 | 2  | 76                    | 118 | 6 | 62  | 0  |
| 2186.5833      | 1                          | 5    | 6    | 1               | 2  | 76                    | 118 | 6 | 65  | 1  |
| 2266.5401      | 1                          | 5    | 6    | 2               | 2  | 76                    | 118 | 6 | 68  | 2  |
| 2346.4969      | 1                          | 5    | 6    | 3               | 2  | 76                    | 118 | 6 | 71  | 3  |
| 2426.4538      | 1                          | 5    | 6    | 4               | 2  | 76                    | 118 | 6 | 74  | 4  |
| 2506.4106      | 1                          | 5    | 6    | 5               | 2  | 76                    | 118 | 6 | 77  | 5  |
| 2586.3674      | 1                          | 5    | 6    | 6               | 2  | 76                    | 118 | 6 | 80  | 6  |
| 2666.3242      | 1                          | 5    | 6    | 7               | 2  | 76                    | 118 | 6 | 83  | 7  |
| 2746.2810      | 1                          | 5    | 6    | 8               | 2  | 76                    | 118 | 6 | 86  | 8  |
| 2826.2378      | 1                          | 5    | 6    | 9               | 2  | 76                    | 118 | 6 | 89  | 9  |
| 2906.1947      | 1                          | 5    | 6    | 10              | 2  | 76                    | 118 | 6 | 92  | 10 |
| 2986.1515      | 1                          | 5    | 6    | 11              | 2  | 76                    | 118 | 6 | 95  | 11 |
| 3066.1083      | 1                          | 5    | 6    | 12              | 2  | 76                    | 118 | 6 | 98  | 12 |
| 3146.0651      | 1                          | 5    | 6    | 13              | 2  | 76                    | 118 | 6 | 101 | 13 |
| 3226.0219      | 1                          | 5    | 6    | 14              | 2  | 76                    | 118 | 6 | 104 | 14 |
| 3305.9787      | 1                          | 5    | 6    | 15              | 2  | 76                    | 118 | 6 | 107 | 15 |
| 3385.9355      | 1                          | 5    | 6    | 16              | 2  | 76                    | 118 | 6 | 110 | 16 |
| <b>sat dp4</b> |                            |      |      |                 |    |                       |     |   |     |    |
| 692.2124       | 0                          | 2    | 2    | 0               | 0  | 24                    | 40  | 2 | 21  | 0  |
| 772.1692       | 0                          | 2    | 2    | 1               | 0  | 24                    | 40  | 2 | 24  | 1  |
| 852.1260       | 0                          | 2    | 2    | 2               | 0  | 24                    | 40  | 2 | 27  | 2  |
| 932.0828       | 0                          | 2    | 2    | 3               | 0  | 24                    | 40  | 2 | 30  | 3  |
| 1012.0396      | 0                          | 2    | 2    | 4               | 0  | 24                    | 40  | 2 | 33  | 4  |
| 1091.9964      | 0                          | 2    | 2    | 5               | 0  | 24                    | 40  | 2 | 36  | 5  |
| 1171.9532      | 0                          | 2    | 2    | 6               | 0  | 24                    | 40  | 2 | 39  | 6  |
| 1251.9101      | 0                          | 2    | 2    | 7               | 0  | 24                    | 40  | 2 | 42  | 7  |
| 1331.8669      | 0                          | 2    | 2    | 8               | 0  | 24                    | 40  | 2 | 45  | 8  |
| 734.2229       | 0                          | 2    | 2    | 0               | 1  | 26                    | 42  | 2 | 22  | 0  |
| 814.1797       | 0                          | 2    | 2    | 1               | 1  | 26                    | 42  | 2 | 25  | 1  |
| 894.1366       | 0                          | 2    | 2    | 2               | 1  | 26                    | 42  | 2 | 28  | 2  |
| 974.0934       | 0                          | 2    | 2    | 3               | 1  | 26                    | 42  | 2 | 31  | 3  |
| 1054.0502      | 0                          | 2    | 2    | 4               | 1  | 26                    | 42  | 2 | 34  | 4  |
| 1134.0070      | 0                          | 2    | 2    | 5               | 1  | 26                    | 42  | 2 | 37  | 5  |
| 1213.9638      | 0                          | 2    | 2    | 6               | 1  | 26                    | 42  | 2 | 40  | 6  |
| 1293.9206      | 0                          | 2    | 2    | 7               | 1  | 26                    | 42  | 2 | 43  | 7  |
| 776.2335       | 0                          | 2    | 2    | 0               | 2  | 28                    | 44  | 2 | 23  | 0  |

## Supplemental Figure 2, continued

| Mass      | Monosaccharide Composition |      |      |                 |    | Elemental Composition |    |   |    |    |
|-----------|----------------------------|------|------|-----------------|----|-----------------------|----|---|----|----|
|           | $\Delta$ HexA              | HexA | HexN | SO <sub>3</sub> | Ac | C                     | H  | N | O  | S  |
| 856.1903  | 0                          | 2    | 2    | 1               | 2  | 28                    | 44 | 2 | 26 | 1  |
| 936.1471  | 0                          | 2    | 2    | 2               | 2  | 28                    | 44 | 2 | 29 | 2  |
| 1016.1039 | 0                          | 2    | 2    | 3               | 2  | 28                    | 44 | 2 | 32 | 3  |
| 1096.0607 | 0                          | 2    | 2    | 4               | 2  | 28                    | 44 | 2 | 35 | 4  |
| 1176.0176 | 0                          | 2    | 2    | 5               | 2  | 28                    | 44 | 2 | 38 | 5  |
| 1255.9744 | 0                          | 2    | 2    | 6               | 2  | 28                    | 44 | 2 | 41 | 6  |
| sat dp6   |                            |      |      |                 |    |                       |    |   |    |    |
| 1029.3133 |                            | 3    | 3    |                 |    | 36                    | 59 | 3 | 31 | 0  |
| 1109.2701 |                            | 3    | 3    | 1               |    | 36                    | 59 | 3 | 34 | 1  |
| 1189.2269 |                            | 3    | 3    | 2               |    | 36                    | 59 | 3 | 37 | 2  |
| 1269.1837 |                            | 3    | 3    | 3               |    | 36                    | 59 | 3 | 40 | 3  |
| 1349.1405 |                            | 3    | 3    | 4               |    | 36                    | 59 | 3 | 43 | 4  |
| 1429.0973 |                            | 3    | 3    | 5               |    | 36                    | 59 | 3 | 46 | 5  |
| 1509.0541 |                            | 3    | 3    | 6               |    | 36                    | 59 | 3 | 49 | 6  |
| 1589.0110 |                            | 3    | 3    | 7               |    | 36                    | 59 | 3 | 52 | 7  |
| 1668.9678 |                            | 3    | 3    | 8               |    | 36                    | 59 | 3 | 55 | 8  |
| 1748.9246 |                            | 3    | 3    | 9               |    | 36                    | 59 | 3 | 58 | 9  |
| 1071.3238 |                            | 3    | 3    |                 | 1  | 38                    | 61 | 3 | 32 | 0  |
| 1151.2806 |                            | 3    | 3    | 1               | 1  | 38                    | 61 | 3 | 35 | 1  |
| 1231.2374 |                            | 3    | 3    | 2               | 1  | 38                    | 61 | 3 | 38 | 2  |
| 1311.1943 |                            | 3    | 3    | 3               | 1  | 38                    | 61 | 3 | 41 | 3  |
| 1391.1511 |                            | 3    | 3    | 4               | 1  | 38                    | 61 | 3 | 44 | 4  |
| 1471.1079 |                            | 3    | 3    | 5               | 1  | 38                    | 61 | 3 | 47 | 5  |
| 1551.0647 |                            | 3    | 3    | 6               | 1  | 38                    | 61 | 3 | 50 | 6  |
| 1631.0215 |                            | 3    | 3    | 7               | 1  | 38                    | 61 | 3 | 53 | 7  |
| 1710.9783 |                            | 3    | 3    | 8               | 1  | 38                    | 61 | 3 | 56 | 8  |
| 1790.9351 |                            | 3    | 3    | 9               | 1  | 38                    | 61 | 3 | 59 | 9  |
| 1113.3344 |                            | 3    | 3    |                 | 2  | 40                    | 63 | 3 | 33 | 0  |
| 1193.2912 |                            | 3    | 3    | 1               | 2  | 40                    | 63 | 3 | 36 | 1  |
| 1273.2480 |                            | 3    | 3    | 2               | 2  | 40                    | 63 | 3 | 39 | 2  |
| 1353.2048 |                            | 3    | 3    | 3               | 2  | 40                    | 63 | 3 | 42 | 3  |
| 1433.1616 |                            | 3    | 3    | 4               | 2  | 40                    | 63 | 3 | 45 | 4  |
| 1513.1185 |                            | 3    | 3    | 5               | 2  | 40                    | 63 | 3 | 48 | 5  |
| 1593.0753 |                            | 3    | 3    | 6               | 2  | 40                    | 63 | 3 | 51 | 6  |
| 1673.0321 |                            | 3    | 3    | 7               | 2  | 40                    | 63 | 3 | 54 | 7  |
| 1752.9889 |                            | 3    | 3    | 8               | 2  | 40                    | 63 | 3 | 57 | 8  |
| 1832.9457 |                            | 3    | 3    | 9               | 2  | 40                    | 63 | 3 | 60 | 9  |
| sat dp8   |                            |      |      |                 |    |                       |    |   |    |    |
| 1366.4141 |                            | 4    | 4    |                 |    | 48                    | 78 | 4 | 41 | 0  |
| 1446.3710 |                            | 4    | 4    | 1               |    | 48                    | 78 | 4 | 44 | 1  |
| 1526.3278 |                            | 4    | 4    | 2               |    | 48                    | 78 | 4 | 47 | 2  |
| 1606.2846 |                            | 4    | 4    | 3               |    | 48                    | 78 | 4 | 50 | 3  |
| 1686.2414 |                            | 4    | 4    | 4               |    | 48                    | 78 | 4 | 53 | 4  |
| 1766.1982 |                            | 4    | 4    | 5               |    | 48                    | 78 | 4 | 56 | 5  |
| 1846.1550 |                            | 4    | 4    | 6               |    | 48                    | 78 | 4 | 59 | 6  |
| 1926.1119 |                            | 4    | 4    | 7               |    | 48                    | 78 | 4 | 62 | 7  |
| 2006.0687 |                            | 4    | 4    | 8               |    | 48                    | 78 | 4 | 65 | 8  |
| 2086.0255 |                            | 4    | 4    | 9               |    | 48                    | 78 | 4 | 68 | 9  |
| 2165.9823 |                            | 4    | 4    | 10              |    | 48                    | 78 | 4 | 71 | 10 |
| 2245.9391 |                            | 4    | 4    | 11              |    | 48                    | 78 | 4 | 74 | 11 |
| 2325.8959 |                            | 4    | 4    | 12              |    | 48                    | 78 | 4 | 77 | 12 |
| 1408.4247 |                            | 4    | 4    |                 | 1  | 50                    | 80 | 4 | 42 | 0  |
| 1488.3815 |                            | 4    | 4    | 1               | 1  | 50                    | 80 | 4 | 45 | 1  |
| 1568.3383 |                            | 4    | 4    | 2               | 1  | 50                    | 80 | 4 | 48 | 2  |
| 1648.2952 |                            | 4    | 4    | 3               | 1  | 50                    | 80 | 4 | 51 | 3  |
| 1728.2520 |                            | 4    | 4    | 4               | 1  | 50                    | 80 | 4 | 54 | 4  |
| 1808.2088 |                            | 4    | 4    | 5               | 1  | 50                    | 80 | 4 | 57 | 5  |
| 1888.1656 |                            | 4    | 4    | 6               | 1  | 50                    | 80 | 4 | 60 | 6  |
| 1968.1224 |                            | 4    | 4    | 7               | 1  | 50                    | 80 | 4 | 63 | 7  |
| 2048.0792 |                            | 4    | 4    | 8               | 1  | 50                    | 80 | 4 | 66 | 8  |
| 2128.0360 |                            | 4    | 4    | 9               | 1  | 50                    | 80 | 4 | 69 | 9  |
| 2207.9929 |                            | 4    | 4    | 10              | 1  | 50                    | 80 | 4 | 72 | 10 |
| 2287.9497 |                            | 4    | 4    | 11              | 1  | 50                    | 80 | 4 | 75 | 11 |
| 2367.9065 |                            | 4    | 4    | 12              | 1  | 50                    | 80 | 4 | 78 | 12 |
| 1450.4353 |                            | 4    | 4    |                 | 2  | 52                    | 82 | 4 | 43 | 0  |
| 1530.3921 |                            | 4    | 4    | 1               | 2  | 52                    | 82 | 4 | 46 | 1  |
| 1610.3489 |                            | 4    | 4    | 2               | 2  | 52                    | 82 | 4 | 49 | 2  |
| 1690.3057 |                            | 4    | 4    | 3               | 2  | 52                    | 82 | 4 | 52 | 3  |
| 1770.2625 |                            | 4    | 4    | 4               | 2  | 52                    | 82 | 4 | 55 | 4  |
| 1850.2194 |                            | 4    | 4    | 5               | 2  | 52                    | 82 | 4 | 58 | 5  |
| 1930.1762 |                            | 4    | 4    | 6               | 2  | 52                    | 82 | 4 | 61 | 6  |
| 2010.1330 |                            | 4    | 4    | 7               | 2  | 52                    | 82 | 4 | 64 | 7  |
| 2090.0898 |                            | 4    | 4    | 8               | 2  | 52                    | 82 | 4 | 67 | 8  |

## Supplemental Figure 2, continued

| Mass            | Monosaccharide Composition |      |      |                 |    | Elemental Composition |     |   |     |    |
|-----------------|----------------------------|------|------|-----------------|----|-----------------------|-----|---|-----|----|
|                 | $\Delta$ HexA              | HexA | HexN | SO <sub>3</sub> | Ac | C                     | H   | N | O   | S  |
| 2170.0466       |                            | 4    | 4    | 9               | 2  | 52                    | 82  | 4 | 70  | 9  |
| 2250.0034       |                            | 4    | 4    | 10              | 2  | 52                    | 82  | 4 | 73  | 10 |
| 2329.9602       |                            | 4    | 4    | 11              | 2  | 52                    | 82  | 4 | 76  | 11 |
| 2409.9171       |                            | 4    | 4    | 12              | 2  | 52                    | 82  | 4 | 79  | 12 |
| <b>sat dp10</b> |                            |      |      |                 |    |                       |     |   |     |    |
| 1703.5150       |                            | 5    | 5    |                 |    | 60                    | 97  | 5 | 51  | 0  |
| 1783.4719       |                            | 5    | 5    | 1               |    | 60                    | 97  | 5 | 54  | 1  |
| 1863.4287       |                            | 5    | 5    | 2               |    | 60                    | 97  | 5 | 57  | 2  |
| 1943.3855       |                            | 5    | 5    | 3               |    | 60                    | 97  | 5 | 60  | 3  |
| 2023.3423       |                            | 5    | 5    | 4               |    | 60                    | 97  | 5 | 63  | 4  |
| 2103.2991       |                            | 5    | 5    | 5               |    | 60                    | 97  | 5 | 66  | 5  |
| 2183.2559       |                            | 5    | 5    | 6               |    | 60                    | 97  | 5 | 69  | 6  |
| 2263.2127       |                            | 5    | 5    | 7               |    | 60                    | 97  | 5 | 72  | 7  |
| 2343.1696       |                            | 5    | 5    | 8               |    | 60                    | 97  | 5 | 75  | 8  |
| 2423.1264       |                            | 5    | 5    | 9               |    | 60                    | 97  | 5 | 78  | 9  |
| 2503.0832       |                            | 5    | 5    | 10              |    | 60                    | 97  | 5 | 81  | 10 |
| 2583.0400       |                            | 5    | 5    | 11              |    | 60                    | 97  | 5 | 84  | 11 |
| 2662.9968       |                            | 5    | 5    | 12              |    | 60                    | 97  | 5 | 87  | 12 |
| 2742.9536       |                            | 5    | 5    | 13              |    | 60                    | 97  | 5 | 90  | 13 |
| 2822.9104       |                            | 5    | 5    | 14              |    | 60                    | 97  | 5 | 93  | 14 |
| 2902.8673       |                            | 5    | 5    | 15              |    | 60                    | 97  | 5 | 96  | 15 |
| 1745.5256       |                            | 5    | 5    |                 | 1  | 62                    | 99  | 5 | 52  | 0  |
| 1825.4824       |                            | 5    | 5    | 1               | 1  | 62                    | 99  | 5 | 55  | 1  |
| 1905.4392       |                            | 5    | 5    | 2               | 1  | 62                    | 99  | 5 | 58  | 2  |
| 1985.3961       |                            | 5    | 5    | 3               | 1  | 62                    | 99  | 5 | 61  | 3  |
| 2065.3529       |                            | 5    | 5    | 4               | 1  | 62                    | 99  | 5 | 64  | 4  |
| 2145.3097       |                            | 5    | 5    | 5               | 1  | 62                    | 99  | 5 | 67  | 5  |
| 2225.2665       |                            | 5    | 5    | 6               | 1  | 62                    | 99  | 5 | 70  | 6  |
| 2305.2233       |                            | 5    | 5    | 7               | 1  | 62                    | 99  | 5 | 73  | 7  |
| 2385.1801       |                            | 5    | 5    | 8               | 1  | 62                    | 99  | 5 | 76  | 8  |
| 2465.1369       |                            | 5    | 5    | 9               | 1  | 62                    | 99  | 5 | 79  | 9  |
| 2545.0938       |                            | 5    | 5    | 10              | 1  | 62                    | 99  | 5 | 82  | 10 |
| 2625.0506       |                            | 5    | 5    | 11              | 1  | 62                    | 99  | 5 | 85  | 11 |
| 2705.0074       |                            | 5    | 5    | 12              | 1  | 62                    | 99  | 5 | 88  | 12 |
| 2784.9642       |                            | 5    | 5    | 13              | 1  | 62                    | 99  | 5 | 91  | 13 |
| 2864.9210       |                            | 5    | 5    | 14              | 1  | 62                    | 99  | 5 | 94  | 14 |
| 2944.8778       |                            | 5    | 5    | 15              | 1  | 62                    | 99  | 5 | 97  | 15 |
| 1787.5362       |                            | 5    | 5    |                 | 2  | 64                    | 101 | 5 | 53  | 0  |
| 1867.4930       |                            | 5    | 5    | 1               | 2  | 64                    | 101 | 5 | 56  | 1  |
| 1947.4498       |                            | 5    | 5    | 2               | 2  | 64                    | 101 | 5 | 59  | 2  |
| 2027.4066       |                            | 5    | 5    | 3               | 2  | 64                    | 101 | 5 | 62  | 3  |
| 2107.3634       |                            | 5    | 5    | 4               | 2  | 64                    | 101 | 5 | 65  | 4  |
| 2187.3202       |                            | 5    | 5    | 5               | 2  | 64                    | 101 | 5 | 68  | 5  |
| 2267.2771       |                            | 5    | 5    | 6               | 2  | 64                    | 101 | 5 | 71  | 6  |
| 2347.2339       |                            | 5    | 5    | 7               | 2  | 64                    | 101 | 5 | 74  | 7  |
| 2427.1907       |                            | 5    | 5    | 8               | 2  | 64                    | 101 | 5 | 77  | 8  |
| 2507.1475       |                            | 5    | 5    | 9               | 2  | 64                    | 101 | 5 | 80  | 9  |
| 2587.1043       |                            | 5    | 5    | 10              | 2  | 64                    | 101 | 5 | 83  | 10 |
| 2667.0611       |                            | 5    | 5    | 11              | 2  | 64                    | 101 | 5 | 86  | 11 |
| 2747.0179       |                            | 5    | 5    | 12              | 2  | 64                    | 101 | 5 | 89  | 12 |
| 2826.9748       |                            | 5    | 5    | 13              | 2  | 64                    | 101 | 5 | 92  | 13 |
| 2906.9316       |                            | 5    | 5    | 14              | 2  | 64                    | 101 | 5 | 95  | 14 |
| 2986.8884       |                            | 5    | 5    | 15              | 2  | 64                    | 101 | 5 | 98  | 15 |
| <b>sat dp12</b> |                            |      |      |                 |    |                       |     |   |     |    |
| 2040.6159       |                            | 6    | 6    |                 |    | 72                    | 116 | 6 | 61  | 0  |
| 2120.5728       |                            | 6    | 6    | 1               |    | 72                    | 116 | 6 | 64  | 1  |
| 2200.5296       |                            | 6    | 6    | 2               |    | 72                    | 116 | 6 | 67  | 2  |
| 2280.4864       |                            | 6    | 6    | 3               |    | 72                    | 116 | 6 | 70  | 3  |
| 2360.4432       |                            | 6    | 6    | 4               |    | 72                    | 116 | 6 | 73  | 4  |
| 2440.4000       |                            | 6    | 6    | 5               |    | 72                    | 116 | 6 | 76  | 5  |
| 2520.3568       |                            | 6    | 6    | 6               |    | 72                    | 116 | 6 | 79  | 6  |
| 2600.3136       |                            | 6    | 6    | 7               |    | 72                    | 116 | 6 | 82  | 7  |
| 2680.2705       |                            | 6    | 6    | 8               |    | 72                    | 116 | 6 | 85  | 8  |
| 2760.2273       |                            | 6    | 6    | 9               |    | 72                    | 116 | 6 | 88  | 9  |
| 2840.1841       |                            | 6    | 6    | 10              |    | 72                    | 116 | 6 | 91  | 10 |
| 2920.1409       |                            | 6    | 6    | 11              |    | 72                    | 116 | 6 | 94  | 11 |
| 3000.0977       |                            | 6    | 6    | 12              |    | 72                    | 116 | 6 | 97  | 12 |
| 3080.0545       |                            | 6    | 6    | 13              |    | 72                    | 116 | 6 | 100 | 13 |
| 3160.0113       |                            | 6    | 6    | 14              |    | 72                    | 116 | 6 | 103 | 14 |
| 3239.9682       |                            | 6    | 6    | 15              |    | 72                    | 116 | 6 | 106 | 15 |
| 3319.9250       |                            | 6    | 6    | 16              |    | 72                    | 116 | 6 | 109 | 16 |
| 3399.8818       |                            | 6    | 6    | 17              |    | 72                    | 116 | 6 | 112 | 17 |
| 3479.8386       |                            | 6    | 6    | 18              |    | 72                    | 116 | 6 | 115 | 18 |

## Supplemental Figure 2, continued

| Mass           | Monosaccharide Composition |      |      |                 |    | Elemental Composition |     |   |     |    |
|----------------|----------------------------|------|------|-----------------|----|-----------------------|-----|---|-----|----|
|                | $\Delta$ HexA              | HexA | HexN | SO <sub>3</sub> | Ac | C                     | H   | N | O   | S  |
| 2082.6265      |                            | 6    | 6    |                 | 1  | 74                    | 118 | 6 | 62  | 0  |
| 2162.5833      |                            | 6    | 6    | 1               | 1  | 74                    | 118 | 6 | 65  | 1  |
| 2242.5401      |                            | 6    | 6    | 2               | 1  | 74                    | 118 | 6 | 68  | 2  |
| 2322.4969      |                            | 6    | 6    | 3               | 1  | 74                    | 118 | 6 | 71  | 3  |
| 2402.4538      |                            | 6    | 6    | 4               | 1  | 74                    | 118 | 6 | 74  | 4  |
| 2482.4106      |                            | 6    | 6    | 5               | 1  | 74                    | 118 | 6 | 77  | 5  |
| 2562.3674      |                            | 6    | 6    | 6               | 1  | 74                    | 118 | 6 | 80  | 6  |
| 2642.3242      |                            | 6    | 6    | 7               | 1  | 74                    | 118 | 6 | 83  | 7  |
| 2722.2810      |                            | 6    | 6    | 8               | 1  | 74                    | 118 | 6 | 86  | 8  |
| 2802.2378      |                            | 6    | 6    | 9               | 1  | 74                    | 118 | 6 | 89  | 9  |
| 2882.1947      |                            | 6    | 6    | 10              | 1  | 74                    | 118 | 6 | 92  | 10 |
| 2962.1515      |                            | 6    | 6    | 11              | 1  | 74                    | 118 | 6 | 95  | 11 |
| 3042.1083      |                            | 6    | 6    | 12              | 1  | 74                    | 118 | 6 | 98  | 12 |
| 3122.0651      |                            | 6    | 6    | 13              | 1  | 74                    | 118 | 6 | 101 | 13 |
| 3202.0219      |                            | 6    | 6    | 14              | 1  | 74                    | 118 | 6 | 104 | 14 |
| 3281.9787      |                            | 6    | 6    | 15              | 1  | 74                    | 118 | 6 | 107 | 15 |
| 3361.9355      |                            | 6    | 6    | 16              | 1  | 74                    | 118 | 6 | 110 | 16 |
| 3441.8924      |                            | 6    | 6    | 17              | 1  | 74                    | 118 | 6 | 113 | 17 |
| 2124.6371      |                            | 6    | 6    |                 | 2  | 76                    | 120 | 6 | 63  | 0  |
| 2204.5939      |                            | 6    | 6    | 1               | 2  | 76                    | 120 | 6 | 66  | 1  |
| 2284.5507      |                            | 6    | 6    | 2               | 2  | 76                    | 120 | 6 | 69  | 2  |
| 2364.5075      |                            | 6    | 6    | 3               | 2  | 76                    | 120 | 6 | 72  | 3  |
| 2444.4643      |                            | 6    | 6    | 4               | 2  | 76                    | 120 | 6 | 75  | 4  |
| 2524.4211      |                            | 6    | 6    | 5               | 2  | 76                    | 120 | 6 | 78  | 5  |
| 2604.3780      |                            | 6    | 6    | 6               | 2  | 76                    | 120 | 6 | 81  | 6  |
| 2684.3348      |                            | 6    | 6    | 7               | 2  | 76                    | 120 | 6 | 84  | 7  |
| 2764.2916      |                            | 6    | 6    | 8               | 2  | 76                    | 120 | 6 | 87  | 8  |
| 2844.2484      |                            | 6    | 6    | 9               | 2  | 76                    | 120 | 6 | 90  | 9  |
| 2924.2052      |                            | 6    | 6    | 10              | 2  | 76                    | 120 | 6 | 93  | 10 |
| 3004.1620      |                            | 6    | 6    | 11              | 2  | 76                    | 120 | 6 | 96  | 11 |
| 3084.1188      |                            | 6    | 6    | 12              | 2  | 76                    | 120 | 6 | 99  | 12 |
| 3164.0757      |                            | 6    | 6    | 13              | 2  | 76                    | 120 | 6 | 102 | 13 |
| 3244.0325      |                            | 6    | 6    | 14              | 2  | 76                    | 120 | 6 | 105 | 14 |
| 3323.9893      |                            | 6    | 6    | 15              | 2  | 76                    | 120 | 6 | 108 | 15 |
| 3403.9461      |                            | 6    | 6    | 16              | 2  | 76                    | 120 | 6 | 111 | 16 |
| 3323.9893      |                            | 6    | 6    | 15              | 2  | 76                    | 120 | 6 | 108 | 15 |
| 3403.9461      |                            | 6    | 6    | 16              | 2  | 76                    | 120 | 6 | 111 | 16 |
| <b>sat dp5</b> |                            |      |      |                 |    |                       |     |   |     |    |
| 853.2812       |                            | 2    | 3    |                 |    | 30                    | 51  | 3 | 25  | 0  |
| 933.2380       |                            | 2    | 3    | 1               |    | 30                    | 51  | 3 | 28  | 1  |
| 1013.1948      |                            | 2    | 3    | 2               |    | 30                    | 51  | 3 | 31  | 2  |
| 1093.1516      |                            | 2    | 3    | 3               |    | 30                    | 51  | 3 | 34  | 3  |
| 1173.1084      |                            | 2    | 3    | 4               |    | 30                    | 51  | 3 | 37  | 4  |
| 1253.0652      |                            | 2    | 3    | 5               |    | 30                    | 51  | 3 | 40  | 5  |
| 1333.0221      |                            | 2    | 3    | 6               |    | 30                    | 51  | 3 | 43  | 6  |
| 1412.9789      |                            | 2    | 3    | 7               |    | 30                    | 51  | 3 | 46  | 7  |
| 1492.9357      |                            | 2    | 3    | 8               |    | 30                    | 51  | 3 | 49  | 8  |
| 1572.8925      |                            | 2    | 3    | 9               |    | 30                    | 51  | 3 | 52  | 9  |
| 895.2917       |                            | 2    | 3    |                 | 1  | 32                    | 53  | 3 | 26  | 0  |
| 975.2485       |                            | 2    | 3    | 1               | 1  | 32                    | 53  | 3 | 29  | 1  |
| 1055.2054      |                            | 2    | 3    | 2               | 1  | 32                    | 53  | 3 | 32  | 2  |
| 1135.1622      |                            | 2    | 3    | 3               | 1  | 32                    | 53  | 3 | 35  | 3  |
| 1215.1190      |                            | 2    | 3    | 4               | 1  | 32                    | 53  | 3 | 38  | 4  |
| 1295.0758      |                            | 2    | 3    | 5               | 1  | 32                    | 53  | 3 | 41  | 5  |
| 1375.0326      |                            | 2    | 3    | 6               | 1  | 32                    | 53  | 3 | 44  | 6  |
| 1454.9894      |                            | 2    | 3    | 7               | 1  | 32                    | 53  | 3 | 47  | 7  |
| 1534.9462      |                            | 2    | 3    | 8               | 1  | 32                    | 53  | 3 | 50  | 8  |
| 1614.9031      |                            | 2    | 3    | 9               | 1  | 32                    | 53  | 3 | 53  | 9  |
| 937.3023       |                            | 2    | 3    |                 | 2  | 34                    | 55  | 3 | 27  | 0  |
| 1017.2591      |                            | 2    | 3    | 1               | 2  | 34                    | 55  | 3 | 30  | 1  |
| 1097.2159      |                            | 2    | 3    | 2               | 2  | 34                    | 55  | 3 | 33  | 2  |
| 1177.1727      |                            | 2    | 3    | 3               | 2  | 34                    | 55  | 3 | 36  | 3  |
| 1257.1296      |                            | 2    | 3    | 4               | 2  | 34                    | 55  | 3 | 39  | 4  |
| 1337.0864      |                            | 2    | 3    | 5               | 2  | 34                    | 55  | 3 | 42  | 5  |
| 1417.0432      |                            | 2    | 3    | 6               | 2  | 34                    | 55  | 3 | 45  | 6  |
| 1497.0000      |                            | 2    | 3    | 7               | 2  | 34                    | 55  | 3 | 48  | 7  |
| 1576.9568      |                            | 2    | 3    | 8               | 2  | 34                    | 55  | 3 | 51  | 8  |
| 1656.9136      |                            | 2    | 3    | 9               | 2  | 34                    | 55  | 3 | 54  | 9  |
| <b>sat dp7</b> |                            |      |      |                 |    |                       |     |   |     |    |
| 1190.3821      |                            | 3    | 4    |                 |    | 42                    | 70  | 4 | 35  | 0  |
| 1270.3389      |                            | 3    | 4    | 1               |    | 42                    | 70  | 4 | 38  | 1  |
| 1350.2957      |                            | 3    | 4    | 2               |    | 42                    | 70  | 4 | 41  | 2  |
| 1430.2525      |                            | 3    | 4    | 3               |    | 42                    | 70  | 4 | 44  | 3  |



## Supplemental Figure 2, continued

| Mass      | Monosaccharide Composition |      |      |                 |    | Elemental Composition |    |   |    |    |
|-----------|----------------------------|------|------|-----------------|----|-----------------------|----|---|----|----|
|           | $\Delta$ HexA              | HexA | HexN | SO <sub>3</sub> | Ac | C                     | H  | N | O  | S  |
| 1510.2093 |                            | 3    | 4    | 4               |    | 42                    | 70 | 4 | 47 | 4  |
| 1590.1661 |                            | 3    | 4    | 5               |    | 42                    | 70 | 4 | 50 | 5  |
| 1670.1229 |                            | 3    | 4    | 6               |    | 42                    | 70 | 4 | 53 | 6  |
| 1750.0798 |                            | 3    | 4    | 7               |    | 42                    | 70 | 4 | 56 | 7  |
| 1830.0366 |                            | 3    | 4    | 8               |    | 42                    | 70 | 4 | 59 | 8  |
| 1909.9934 |                            | 3    | 4    | 9               |    | 42                    | 70 | 4 | 62 | 9  |
| 1989.9502 |                            | 3    | 4    | 10              |    | 42                    | 70 | 4 | 65 | 10 |
| 2069.9070 |                            | 3    | 4    | 11              |    | 42                    | 70 | 4 | 68 | 11 |
| 2149.8638 |                            | 3    | 4    | 12              |    | 42                    | 70 | 4 | 71 | 12 |
| 1232.3926 |                            | 3    | 4    |                 | 1  | 44                    | 72 | 4 | 36 | 0  |
| 1312.3494 |                            | 3    | 4    | 1               | 1  | 44                    | 72 | 4 | 39 | 1  |
| 1392.3063 |                            | 3    | 4    | 2               | 1  | 44                    | 72 | 4 | 42 | 2  |
| 1472.2631 |                            | 3    | 4    | 3               | 1  | 44                    | 72 | 4 | 45 | 3  |
| 1552.2199 |                            | 3    | 4    | 4               | 1  | 44                    | 72 | 4 | 48 | 4  |
| 1632.1767 |                            | 3    | 4    | 5               | 1  | 44                    | 72 | 4 | 51 | 5  |
| 1712.1335 |                            | 3    | 4    | 6               | 1  | 44                    | 72 | 4 | 54 | 6  |
| 1792.0903 |                            | 3    | 4    | 7               | 1  | 44                    | 72 | 4 | 57 | 7  |
| 1872.0471 |                            | 3    | 4    | 8               | 1  | 44                    | 72 | 4 | 60 | 8  |
| 1952.0040 |                            | 3    | 4    | 9               | 1  | 44                    | 72 | 4 | 63 | 9  |
| 2031.9608 |                            | 3    | 4    | 10              | 1  | 44                    | 72 | 4 | 66 | 10 |
| 2111.9176 |                            | 3    | 4    | 11              | 1  | 44                    | 72 | 4 | 69 | 11 |
| 2191.8744 |                            | 3    | 4    | 12              | 1  | 44                    | 72 | 4 | 72 | 12 |
| 1274.4032 |                            | 3    | 4    |                 | 2  | 46                    | 74 | 4 | 37 | 0  |
| 1354.3600 |                            | 3    | 4    | 1               | 2  | 46                    | 74 | 4 | 40 | 1  |
| 1434.3168 |                            | 3    | 4    | 2               | 2  | 46                    | 74 | 4 | 43 | 2  |
| 1514.2736 |                            | 3    | 4    | 3               | 2  | 46                    | 74 | 4 | 46 | 3  |
| 1594.2304 |                            | 3    | 4    | 4               | 2  | 46                    | 74 | 4 | 49 | 4  |
| 1674.1873 |                            | 3    | 4    | 5               | 2  | 46                    | 74 | 4 | 52 | 5  |
| 1754.1441 |                            | 3    | 4    | 6               | 2  | 46                    | 74 | 4 | 55 | 6  |
| 1834.1009 |                            | 3    | 4    | 7               | 2  | 46                    | 74 | 4 | 58 | 7  |
| 1914.0577 |                            | 3    | 4    | 8               | 2  | 46                    | 74 | 4 | 61 | 8  |
| 1994.0145 |                            | 3    | 4    | 9               | 2  | 46                    | 74 | 4 | 64 | 9  |
| 2073.9713 |                            | 3    | 4    | 10              | 2  | 46                    | 74 | 4 | 67 | 10 |
| 2153.9282 |                            | 3    | 4    | 11              | 2  | 46                    | 74 | 4 | 70 | 11 |
| 2233.8850 |                            | 3    | 4    | 12              | 2  | 46                    | 74 | 4 | 73 | 12 |
| sat dp9   |                            |      |      |                 |    |                       |    |   |    |    |
| 1527.4830 |                            | 4    | 5    |                 |    | 54                    | 89 | 5 | 45 | 0  |
| 1607.4398 |                            | 4    | 5    | 1               |    | 54                    | 89 | 5 | 48 | 1  |
| 1687.3966 |                            | 4    | 5    | 2               |    | 54                    | 89 | 5 | 51 | 2  |
| 1767.3534 |                            | 4    | 5    | 3               |    | 54                    | 89 | 5 | 54 | 3  |
| 1847.3102 |                            | 4    | 5    | 4               |    | 54                    | 89 | 5 | 57 | 4  |
| 1927.2670 |                            | 4    | 5    | 5               |    | 54                    | 89 | 5 | 60 | 5  |
| 2007.2238 |                            | 4    | 5    | 6               |    | 54                    | 89 | 5 | 63 | 6  |
| 2087.1807 |                            | 4    | 5    | 7               |    | 54                    | 89 | 5 | 66 | 7  |
| 2167.1375 |                            | 4    | 5    | 8               |    | 54                    | 89 | 5 | 69 | 8  |
| 2247.0943 |                            | 4    | 5    | 9               |    | 54                    | 89 | 5 | 72 | 9  |
| 2327.0511 |                            | 4    | 5    | 10              |    | 54                    | 89 | 5 | 75 | 10 |
| 2407.0079 |                            | 4    | 5    | 11              |    | 54                    | 89 | 5 | 78 | 11 |
| 2486.9647 |                            | 4    | 5    | 12              |    | 54                    | 89 | 5 | 81 | 12 |
| 2566.9215 |                            | 4    | 5    | 13              |    | 54                    | 89 | 5 | 84 | 13 |
| 2646.8784 |                            | 4    | 5    | 14              |    | 54                    | 89 | 5 | 87 | 14 |
| 2726.8352 |                            | 4    | 5    | 15              |    | 54                    | 89 | 5 | 90 | 15 |
| 1569.4935 |                            | 4    | 5    |                 |    | 56                    | 91 | 5 | 46 | 0  |
| 1649.4503 |                            | 4    | 5    | 1               | 1  | 56                    | 91 | 5 | 49 | 1  |
| 1729.4072 |                            | 4    | 5    | 2               | 1  | 56                    | 91 | 5 | 52 | 2  |
| 1809.3640 |                            | 4    | 5    | 3               | 1  | 56                    | 91 | 5 | 55 | 3  |
| 1889.3208 |                            | 4    | 5    | 4               | 1  | 56                    | 91 | 5 | 58 | 4  |
| 1969.2776 |                            | 4    | 5    | 5               | 1  | 56                    | 91 | 5 | 61 | 5  |
| 2049.2344 |                            | 4    | 5    | 6               | 1  | 56                    | 91 | 5 | 64 | 6  |
| 2129.1912 |                            | 4    | 5    | 7               | 1  | 56                    | 91 | 5 | 67 | 7  |
| 2209.1480 |                            | 4    | 5    | 8               | 1  | 56                    | 91 | 5 | 70 | 8  |
| 2289.1049 |                            | 4    | 5    | 9               | 1  | 56                    | 91 | 5 | 73 | 9  |
| 2369.0617 |                            | 4    | 5    | 10              | 1  | 56                    | 91 | 5 | 76 | 10 |
| 2449.0185 |                            | 4    | 5    | 11              | 1  | 56                    | 91 | 5 | 79 | 11 |
| 2528.9753 |                            | 4    | 5    | 12              | 1  | 56                    | 91 | 5 | 82 | 12 |
| 2608.9321 |                            | 4    | 5    | 13              | 1  | 56                    | 91 | 5 | 85 | 13 |
| 2688.8889 |                            | 4    | 5    | 14              | 1  | 56                    | 91 | 5 | 88 | 14 |
| 2768.8457 |                            | 4    | 5    | 15              | 1  | 56                    | 91 | 5 | 91 | 15 |
| 1611.5041 |                            | 4    | 5    |                 | 2  | 58                    | 93 | 5 | 47 | 0  |
| 1691.4609 |                            | 4    | 5    | 1               | 2  | 58                    | 93 | 5 | 50 | 1  |
| 1771.4177 |                            | 4    | 5    | 2               | 2  | 58                    | 93 | 5 | 53 | 2  |
| 1851.3745 |                            | 4    | 5    | 3               | 2  | 58                    | 93 | 5 | 56 | 3  |
| 1931.3313 |                            | 4    | 5    | 4               | 2  | 58                    | 93 | 5 | 59 | 4  |

## Supplemental Figure 2, continued

| Mass      | Monosaccharide Composition |      |      |                 |    | Elemental Composition |     |   |     |    |
|-----------|----------------------------|------|------|-----------------|----|-----------------------|-----|---|-----|----|
|           | $\Delta$ HexA              | HexA | HexN | SO <sub>3</sub> | Ac | C                     | H   | N | O   | S  |
| 2011.2882 |                            | 4    | 5    | 5               | 2  | 58                    | 93  | 5 | 62  | 5  |
| 2091.2450 |                            | 4    | 5    | 6               | 2  | 58                    | 93  | 5 | 65  | 6  |
| 2171.2018 |                            | 4    | 5    | 7               | 2  | 58                    | 93  | 5 | 68  | 7  |
| 2251.1586 |                            | 4    | 5    | 8               | 2  | 58                    | 93  | 5 | 71  | 8  |
| 2331.1154 |                            | 4    | 5    | 9               | 2  | 58                    | 93  | 5 | 74  | 9  |
| 2411.0722 |                            | 4    | 5    | 10              | 2  | 58                    | 93  | 5 | 77  | 10 |
| 2491.0290 |                            | 4    | 5    | 11              | 2  | 58                    | 93  | 5 | 80  | 11 |
| 2570.9859 |                            | 4    | 5    | 12              | 2  | 58                    | 93  | 5 | 83  | 12 |
| 2650.9427 |                            | 4    | 5    | 13              | 2  | 58                    | 93  | 5 | 86  | 13 |
| 2730.8995 |                            | 4    | 5    | 14              | 2  | 58                    | 93  | 5 | 89  | 14 |
| 2810.8563 |                            | 4    | 5    | 15              | 2  | 58                    | 93  | 5 | 92  | 15 |
| sat dp11  |                            |      |      |                 |    |                       |     |   |     |    |
| 1864.5839 |                            | 5    | 6    |                 |    | 66                    | 108 | 6 | 55  | 0  |
| 1944.5407 |                            | 5    | 6    | 1               |    | 66                    | 108 | 6 | 58  | 1  |
| 2024.4975 |                            | 5    | 6    | 2               |    | 66                    | 108 | 6 | 61  | 2  |
| 2104.4543 |                            | 5    | 6    | 3               |    | 66                    | 108 | 6 | 64  | 3  |
| 2184.4111 |                            | 5    | 6    | 4               |    | 66                    | 108 | 6 | 67  | 4  |
| 2264.3679 |                            | 5    | 6    | 5               |    | 66                    | 108 | 6 | 70  | 5  |
| 2344.3247 |                            | 5    | 6    | 6               |    | 66                    | 108 | 6 | 73  | 6  |
| 2424.2816 |                            | 5    | 6    | 7               |    | 66                    | 108 | 6 | 76  | 7  |
| 2504.2384 |                            | 5    | 6    | 8               |    | 66                    | 108 | 6 | 79  | 8  |
| 2584.1952 |                            | 5    | 6    | 9               |    | 66                    | 108 | 6 | 82  | 9  |
| 2664.1520 |                            | 5    | 6    | 10              |    | 66                    | 108 | 6 | 85  | 10 |
| 2744.1088 |                            | 5    | 6    | 11              |    | 66                    | 108 | 6 | 88  | 11 |
| 2824.0656 |                            | 5    | 6    | 12              |    | 66                    | 108 | 6 | 91  | 12 |
| 2904.0224 |                            | 5    | 6    | 13              |    | 66                    | 108 | 6 | 94  | 13 |
| 2983.9793 |                            | 5    | 6    | 14              |    | 66                    | 108 | 6 | 97  | 14 |
| 3063.9361 |                            | 5    | 6    | 15              |    | 66                    | 108 | 6 | 100 | 15 |
| 3143.8929 |                            | 5    | 6    | 16              |    | 66                    | 108 | 6 | 103 | 16 |
| 3223.8497 |                            | 5    | 6    | 17              |    | 66                    | 108 | 6 | 106 | 17 |
| 3303.8065 |                            | 5    | 6    | 18              |    | 66                    | 108 | 6 | 109 | 18 |
| 1906.5944 |                            | 5    | 6    |                 | 1  | 68                    | 110 | 6 | 56  | 0  |
| 1986.5512 |                            | 5    | 6    | 1               | 1  | 68                    | 110 | 6 | 59  | 1  |
| 2066.5080 |                            | 5    | 6    | 2               | 1  | 68                    | 110 | 6 | 62  | 2  |
| 2146.4649 |                            | 5    | 6    | 3               | 1  | 68                    | 110 | 6 | 65  | 3  |
| 2226.4217 |                            | 5    | 6    | 4               | 1  | 68                    | 110 | 6 | 68  | 4  |
| 2306.3785 |                            | 5    | 6    | 5               | 1  | 68                    | 110 | 6 | 71  | 5  |
| 2386.3353 |                            | 5    | 6    | 6               | 1  | 68                    | 110 | 6 | 74  | 6  |
| 2466.2921 |                            | 5    | 6    | 7               | 1  | 68                    | 110 | 6 | 77  | 7  |
| 2546.2489 |                            | 5    | 6    | 8               | 1  | 68                    | 110 | 6 | 80  | 8  |
| 2626.2057 |                            | 5    | 6    | 9               | 1  | 68                    | 110 | 6 | 83  | 9  |
| 2706.1626 |                            | 5    | 6    | 10              | 1  | 68                    | 110 | 6 | 86  | 10 |
| 2786.1194 |                            | 5    | 6    | 11              | 1  | 68                    | 110 | 6 | 89  | 11 |
| 2866.0762 |                            | 5    | 6    | 12              | 1  | 68                    | 110 | 6 | 92  | 12 |
| 2946.0330 |                            | 5    | 6    | 13              | 1  | 68                    | 110 | 6 | 95  | 13 |
| 3025.9898 |                            | 5    | 6    | 14              | 1  | 68                    | 110 | 6 | 98  | 14 |
| 3105.9466 |                            | 5    | 6    | 15              | 1  | 68                    | 110 | 6 | 101 | 15 |
| 3185.9035 |                            | 5    | 6    | 16              | 1  | 68                    | 110 | 6 | 104 | 16 |
| 3265.8603 |                            | 5    | 6    | 17              | 1  | 68                    | 110 | 6 | 107 | 17 |
| 1948.6050 |                            | 5    | 6    |                 | 2  | 70                    | 112 | 6 | 57  | 0  |
| 2028.5618 |                            | 5    | 6    | 1               | 2  | 70                    | 112 | 6 | 60  | 1  |
| 2108.5186 |                            | 5    | 6    | 2               | 2  | 70                    | 112 | 6 | 63  | 2  |
| 2188.4754 |                            | 5    | 6    | 3               | 2  | 70                    | 112 | 6 | 66  | 3  |
| 2268.4322 |                            | 5    | 6    | 4               | 2  | 70                    | 112 | 6 | 69  | 4  |
| 2348.3891 |                            | 5    | 6    | 5               | 2  | 70                    | 112 | 6 | 72  | 5  |
| 2428.3459 |                            | 5    | 6    | 6               | 2  | 70                    | 112 | 6 | 75  | 6  |
| 2508.3027 |                            | 5    | 6    | 7               | 2  | 70                    | 112 | 6 | 78  | 7  |
| 2588.2595 |                            | 5    | 6    | 8               | 2  | 70                    | 112 | 6 | 81  | 8  |
| 2668.2163 |                            | 5    | 6    | 9               | 2  | 70                    | 112 | 6 | 84  | 9  |
| 2748.1731 |                            | 5    | 6    | 10              | 2  | 70                    | 112 | 6 | 87  | 10 |
| 2828.1299 |                            | 5    | 6    | 11              | 2  | 70                    | 112 | 6 | 90  | 11 |
| 2908.0868 |                            | 5    | 6    | 12              | 2  | 70                    | 112 | 6 | 93  | 12 |
| 2988.0436 |                            | 5    | 6    | 13              | 2  | 70                    | 112 | 6 | 96  | 13 |
| 3068.0004 |                            | 5    | 6    | 14              | 2  | 70                    | 112 | 6 | 99  | 14 |
| 3147.9572 |                            | 5    | 6    | 15              | 2  | 70                    | 112 | 6 | 102 | 15 |
| 3227.9140 |                            | 5    | 6    | 16              | 2  | 70                    | 112 | 6 | 105 | 16 |

Supplemental Figure 3.

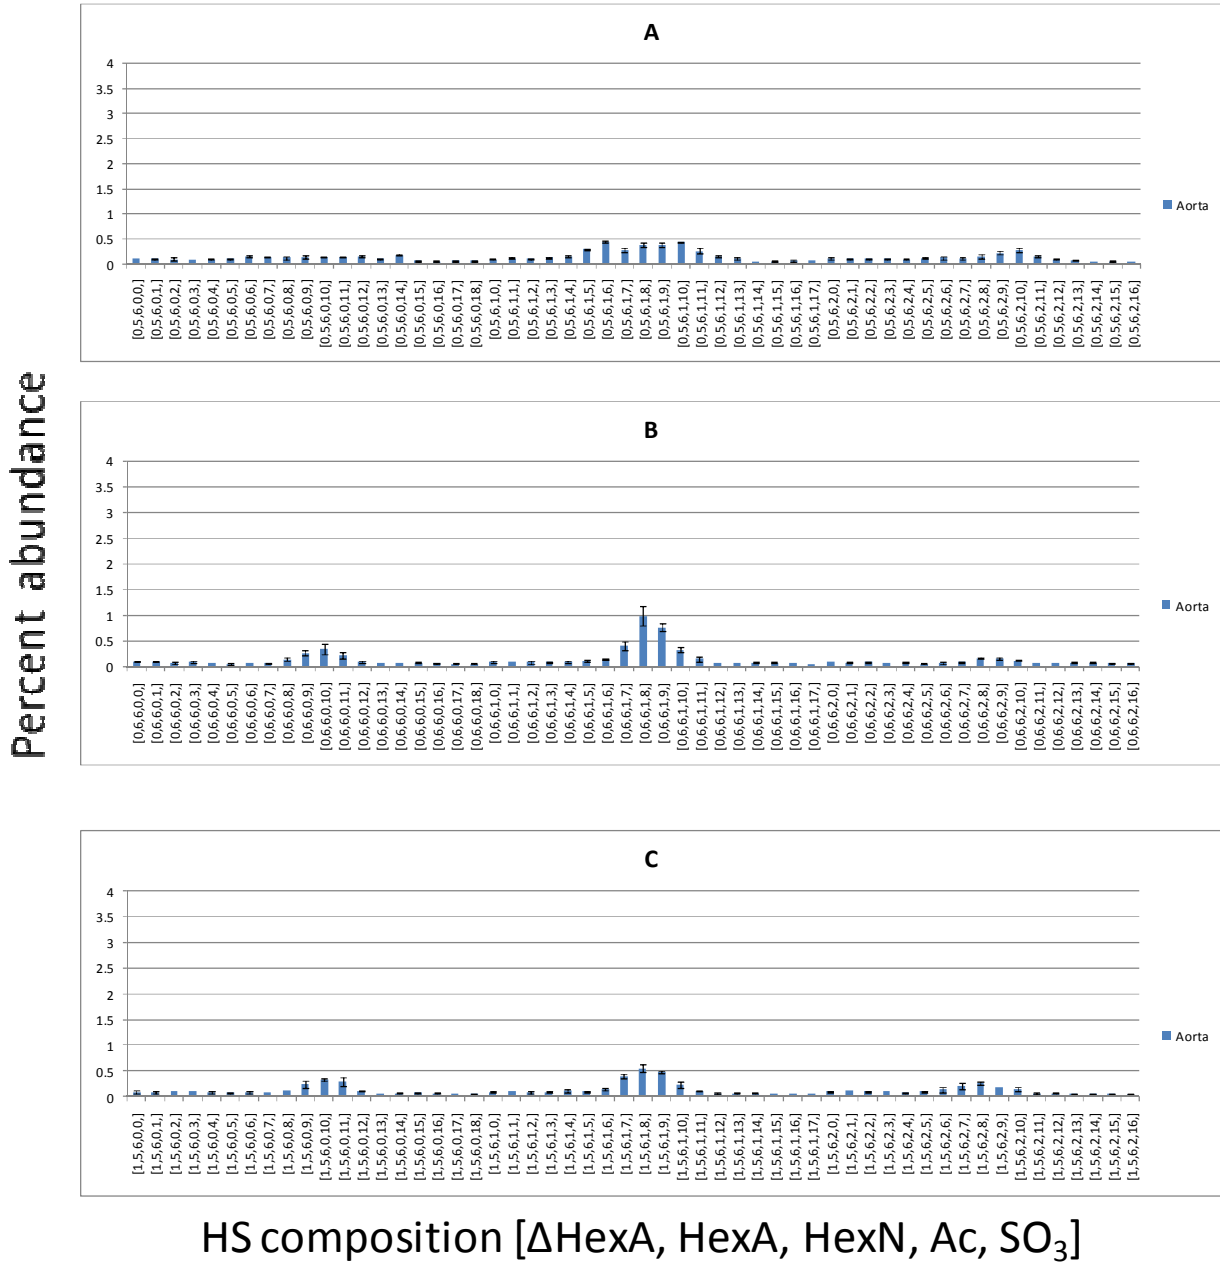

**Supplemental Figure 4.**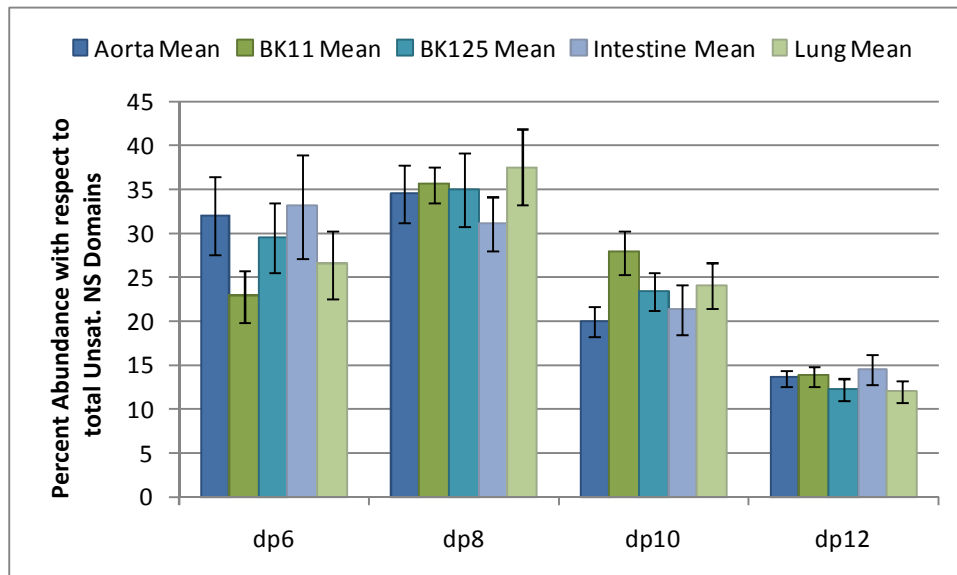

Supplement: NIHMS347250-supplement-supplement_1.pdf [file NIHMS347250-supplement-supplement_1.pdf]
